# Supplementary material for: Gate-tunable superconductivity and charge-density wave in monolayer 1T′-MoTe2 and 1T′-WTe2
Source: Royal Society of Chemistry journal article supplement (doi:10.1039/d1cp02214h), 2021-01-01
Supplement: d1cp02214h1.pdf [file d1cp02214h1.pdf]

## Electronic Supplementary Information:

### Gate-tunable superconductivity and charge-density wave in monolayer $1T'$ -MoTe<sub>2</sub> and $1T'$ -WTe<sub>2</sub>

Jun-Ho Lee<sup>1</sup> and Young-Woo Son<sup>1</sup>

<sup>1</sup>*Korea Institute for Advanced Study, 85 Hoegiro, Seoul 02455, Korea*

(Dated: July 15, 2021)

#### VALIDATION OF THE $2 \times 5$ CDW AGAINST THE $2 \times 8$ CDW

In order to find the  $\mathbf{q}$ -point at which the lowest phonon frequency of the acoustic phonon mode for a given  $n_{2D}$  manifests, we computed phonon frequencies of MoTe<sub>2</sub> in the vicinity of  $\mathbf{q} = \frac{4}{5}\mathbf{XM}$  with a fine  $\mathbf{q}$ -grid at  $n_{2D} = 1.80 \times 10^{14} \text{e/cm}^2$  using the jellium model doping. We confirmed that  $\mathbf{q} = \frac{4}{5}\mathbf{XM}$  has lower frequency than  $\mathbf{q} = \frac{3}{4}\mathbf{XM}$  as shown in Fig. S1.

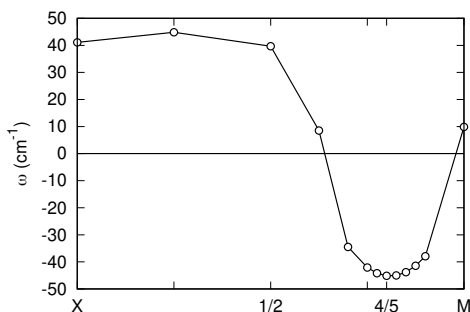

Figure S1. Acoustic phonon mode of MoTe<sub>2</sub> at  $n_{2D} = 1.80 \times 10^{14} \text{e/cm}^2$  along XM line. Phonon frequencies are computed by density functional perturbation theory at each open circle.

Figure S2 shows relative energy gain by the formation of the  $2 \times 5$  and  $2 \times 8$  CDW phases. In the jellium model doping, as additional charges do not break inversion symmetry of the system, a CDW phase with inversion symmetry is possible. We found that  $2 \times 5$  CDW phase with inversion symmetry is  $\sim 10$  meV per  $1 \times 1$  unitcell more stable than the  $2 \times 8$  CDW phase which corresponds to the  $\mathbf{q} = \frac{3}{4}\mathbf{XM}$ . These results support that the lowest phonon frequency occurs at  $\mathbf{q} = \frac{4}{5}\mathbf{XM}$  in an intermediate doping region.

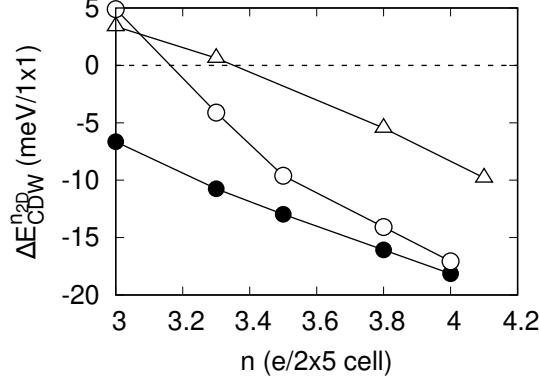

Figure S2. Energy gain by the CDW formation. Filled (open) circles represent  $2 \times 5$  CDW phases with (without) inversion symmetry while open triangles represent  $2 \times 8$  CDW phase.

### PROJECTED BAND STRUCTURE OF $2 \times 5$ CDW

We plot projected band structure of the  $2 \times 5$  CDW phase and find that band inversion is clearly shown, which leads to a two-dimensional topological insulator.

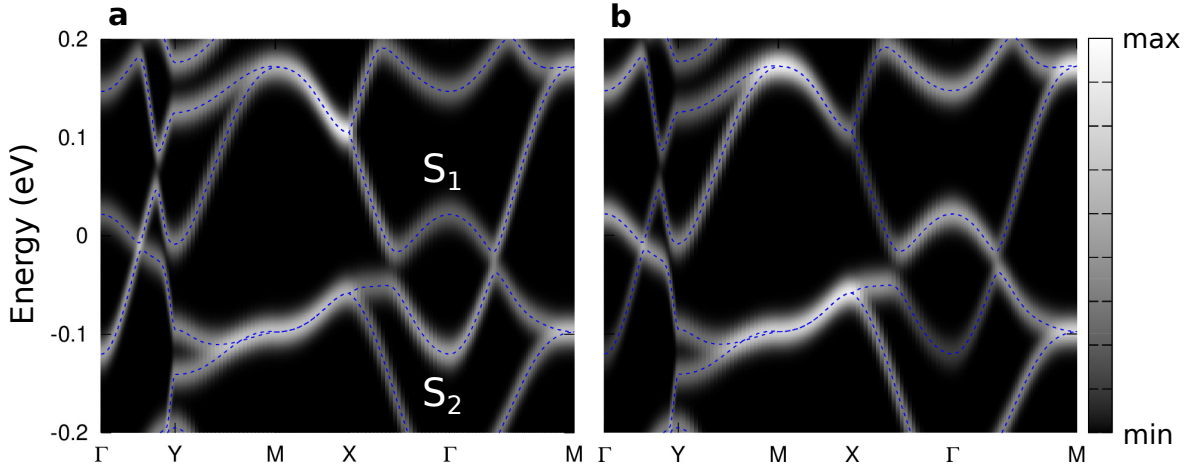

Figure S3. Band structures of the  $2 \times 5$  CDW phase of  $\text{MoTe}_2$  with 0.5% tensile strain along  $y$ -direction projecting (a) Mo and (b) Te contributions without SOC.  $S_1$  and  $S_2$  bands manifest distinct orbital character. Energy in zero is set to Fermi level.  $n_{2D}$  is set to  $1.81 \times 10^{14} \text{e/cm}^2$ .

### ELECTRONIC STRUCTURE CHANGE UPON TENSILE STRAIN

We applied tensile strain along the  $y$ -direction and computed band structures as shown in Fig. S4. We confirm that a band gap forms while preserving inverted band character (Fig. S4(a)-

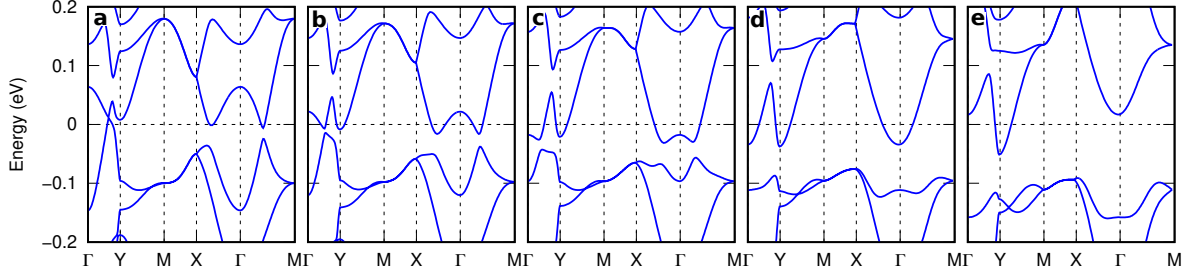

Figure S4. Band structures of the  $2 \times 5$  CDW phase of  $\text{MoTe}_2$  with respect to tensile strain along  $y$ -direction without SOC (a) pristine, (b) 0.5%, (c) 1.0%, (d) 2.0%, and (e) 3.0%. Energy in zero is set to Fermi level. SOC is not included.  $n_{2D}$  is set to  $1.81 \times 10^{14} \text{e}/\text{cm}^2$ .

(c). As we increase the strain more than 2%, the inverted band character disappears as shown in Fig. S4(d) and (e).
